# Supplementary material for: High-speed C–H chlorination of ethylene carbonate using a new photoflow setup
Source: publisher site journal article supplement (doi:10.3762/bjoc.18.16), 2022-01-27
Supplement: Additional file 1 [file 1860-5397-18-16-S1.pdf]

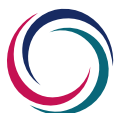

## Supporting Information

for

### High-speed C–H chlorination of ethylene carbonate using a new photoflow setup

Takayoshi Kasakado, Takahide Fukuyama, Tomohiro Nakagawa, Shinji Taguchi and Ilhyong Ryu

*Beilstein J. Org. Chem.* **2022**, *18*, 152–158. [doi:10.3762/bjoc.18.16](https://doi.org/10.3762/bjoc.18.16)

### GC analysis and NMR spectra of the crude reaction mixture for the chlorination of compound 1

**Table of contents**

General information ..... S2  
Reference ..... S2  
GC Chart ..... S2  
Copies of NMR spectra ..... S3

## General information

GC analysis was performed on a Shimadzu GC-2014 instrument equipped with an FID detector using a J&W Scientific (Hongkong, China) DB-1 column under the following conditions: initial oven temperature was held at 40 °C for 5 min, the first ramp was 5 °C/min to 250 °C, which was held for 10 min. Yields were determined by using the percentage peak area method with compensation for the relative sensitivities of each component. <sup>1</sup>H NMR spectra were recorded with a JEOL JMN-ECS400 (400 MHz) and referenced to the solvent peak at 7.26 ppm. <sup>13</sup>C NMR spectra were recorded with a JEOL JMN-ECS400 (100 MHz) and referenced to the solvent peak at 77.0 ppm. Product **2** is a known compound [1] and the dichlorinated product **2'** is commercially available from Sigma–Aldrich Co. Inc. These compounds were identified by <sup>1</sup>H NMR and <sup>13</sup>C NMR analysis and comparison with the reported data.

## Reference

1. Wang, W.-M.; Wang, W.-T.; Wang, M.-Y.; Gu, A.-L.; Hu, T.-D.; Zhang, Y.-X.; Wu, Z.-L. *Inorg. Chem.* **2021**, 60, 9122–9131

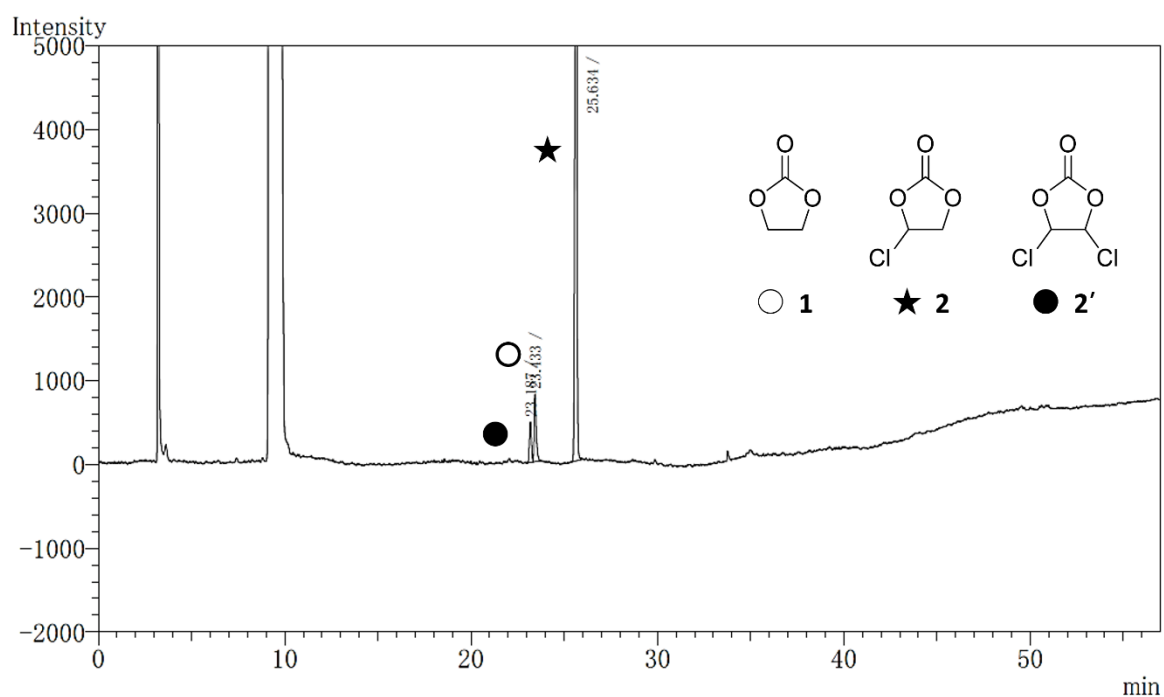

| retention time (min) | area  | height | concentration (area%) |
|----------------------|-------|--------|-----------------------|
| 23.187               | 3545  | 484    | 3.501                 |
| 23.433               | 6022  | 805    | 5.948                 |
| 25.634               | 91693 | 15698  | 90.552                |

**Figure S1:** GC analysis data of the crude product mixture from the C–H chlorination reaction of ethylene carbonate (**1**).

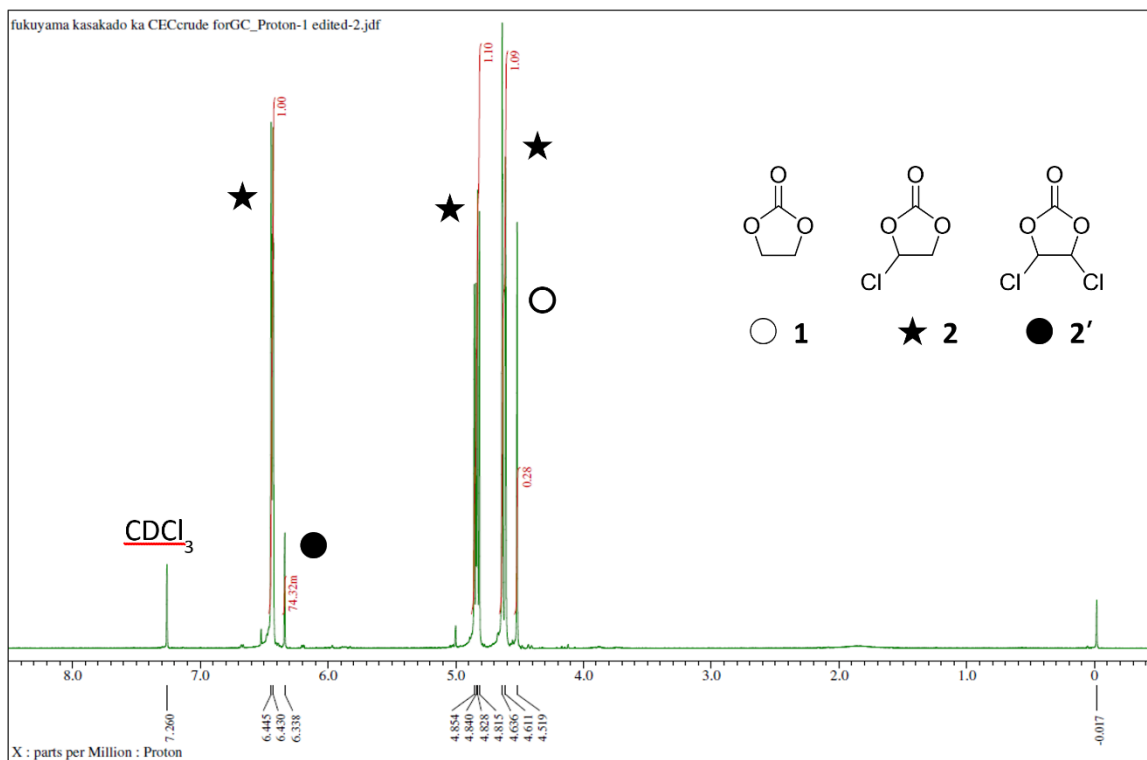

**Figure S2:** <sup>1</sup>H NMR spectrum of the crude reaction mixture from the C–H chlorination of ethylene carbonate (**1**) [1].

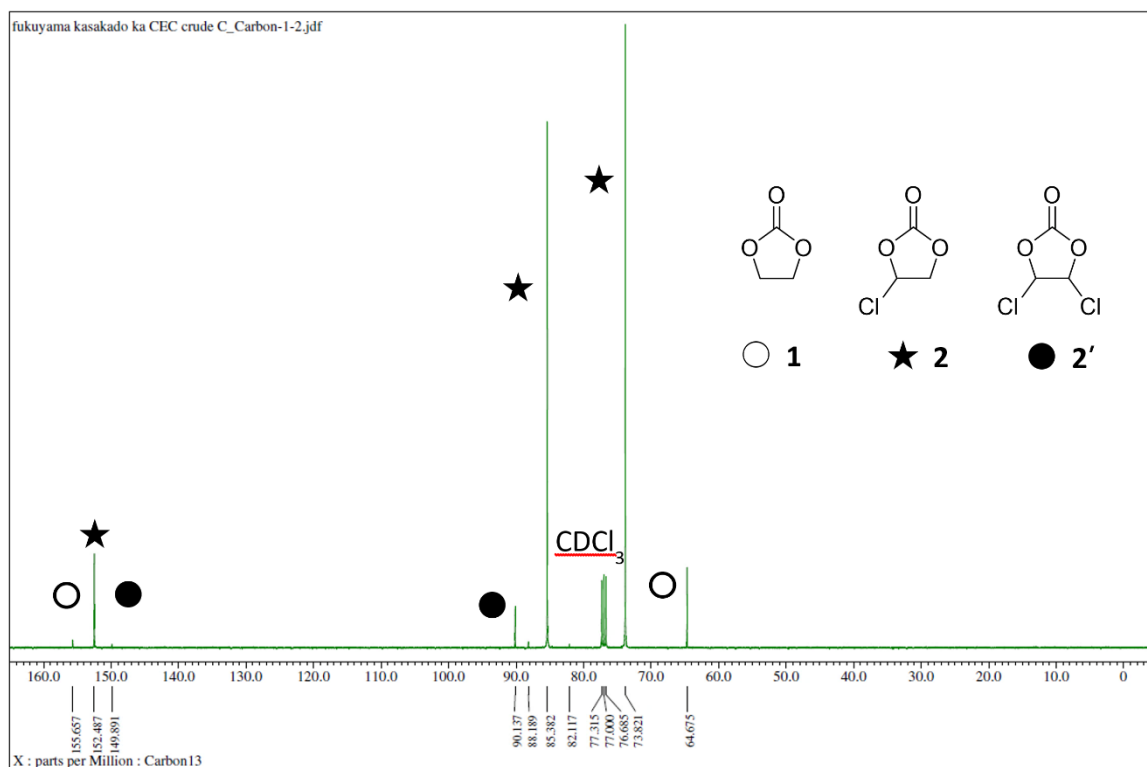

**Figure S3:** <sup>13</sup>C NMR spectrum of the crude reaction mixture from the C–H chlorination of ethylene carbonate (**1**) [1].
